# Supplementary material for: In Vivo Reinsertion of Excised Episomes by the V(D)J Recombinase: A Potential Threat to Genomic Stability
Source: PubMed Central journal article supplement (PMC1820826; doi:10.1371/journal.pbio.0050043), 2007-02-13

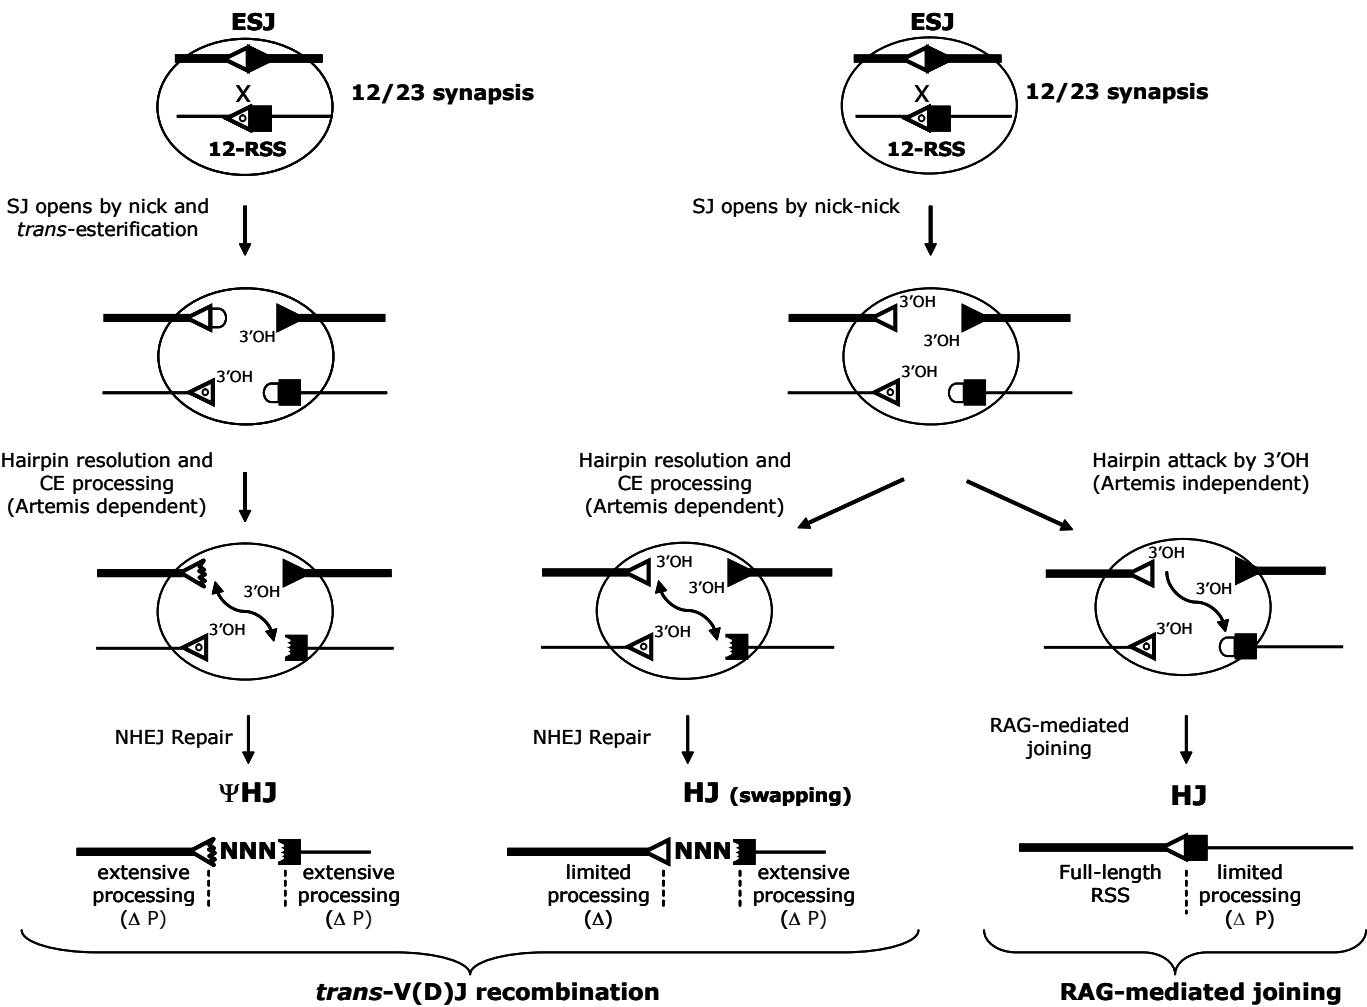

Supplement: pbio.0050043.sg002.pdf [file pbio.0050043.sg002.pdf]
