# Supplementary material for: In Vivo Reinsertion of Excised Episomes by the V(D)J Recombinase: A Potential Threat to Genomic Stability
Source: PubMed Central journal article supplement (PMC1820826; doi:10.1371/journal.pbio.0050043), 2007-02-13
Supplement: pbio.0050043.sg003.pdf [file pbio.0050043.sg003.pdf]

(by-stander) RSS **J $\beta$ 2.7**

9 12 7

ggtttgggtgtgggggttgagcctctgtg  
 |||  
ggtttgggtgtgggggttgagcctctgtg (g c)  
ggtttgggtgtgggggttgagcctctgtg  
ggtttgggtgtgggggttgagcctctg  
Ggtttgtgtgggggttgagcct  
ggttttatgggggttgagc  
ggtttgggtgtgggggttg

**J $\delta$ 2**

CTCCTGGGACACCCGACAGATG  
 |||  
 (g C)TCCTGGGACACCCGACAGATG  $\Psi$ HJ  
 g CTCCTGGGACACCCGACAGATG  $\Psi$ HJ  
 CA TCCTGGGACACCCGACAGATG  $\Psi$ HJ  
 ACACCCGACAGATG  $\Psi$ HJ  
 g CTCCTGGGACACCCGACAGATG  $\Psi$ HJ  
 g CTCCTGGGACACCCGACAGATG  $\Psi$ HJ

GGATATCGGAGGGTCA  
 CA  
 ATGTGT  
 AGGGTCTGGGGT

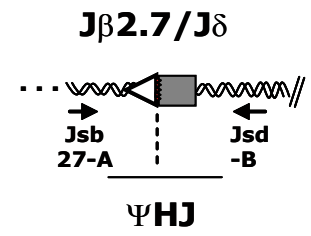

(by-stander) RSS **J $\beta$ 2.7**

9 12 7

ggtttgggtgtgggggttgagcctctgtg  
 |||  
ggtttgggtgtgggggttgagcctc  
ggtttgggtgtgggggttgagcctctg  
ggtttgggtgtgggggttgagcctct  
ggtttgggtgtgggggttg  
ggtttgggtgtgggggttgagcctctgtg cac  
ggtttgggtgtgggggttgagcctctgtg c  
ggtttgggtgtgggggttgagcctctgtg c  
ggtttgggtgtgggggttgagcctctgtg c  
ggtttgggtgtgggggttgagcctctg

**D $\delta$ 1**

7 23 9

GTGGCATATCacacaggttgaagtataattaaacctctgttcagaaacact  
 |||  
 GTGGCATATCacacaggttgaagtataattaaacctctgttcagaaacact  $\Psi$ HJ  
 GTGGCATATCacacaggttgaagtataattaaacctctgttcagaaacact  $\Psi$ HJ  
 TGGCATATCacacaggttgaagtataattaaacctctgttcagaaacact  $\Psi$ HJ  
 GGCAATATCacacaggttgaagtataattaaacctctgttcagaaacact  $\Psi$ HJ  
 CAcacaggttgaagtataattaaacctctgttcagaaacact  $\Psi$ HJ  
 CAcacaggttgaagtataattaaacctctgttcagaaacact  $\Psi$ HJ  
 acaggttgaagtataattaaacctctgttcagaaacact SJ/ $\Psi$ HJ  
 caggttgaagtataattaaacctctgttcagaaacact SJ/ $\Psi$ HJ  
 caggttgaagtataattaaacctctgttcagaaacact SJ/ $\Psi$ HJ

CTAT  
 G  
 ATA  
 GG  
 CC  
 AAA  
 GCTGG  
 GCCTATCCCCCGCCGGAT

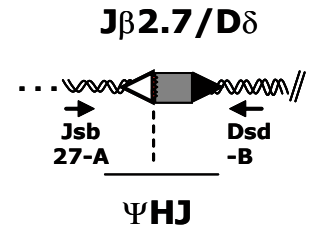

(by-stander) RSS **J $\beta$ 2.7**

9 12 7

ggtttgggtgtgggggttgagcctctgtg  
 |||  
ggtttgggtgtgggggttgagcctctgt  
ggtttgggtgtgggggttgagcctctgtg  
ggtttgggtgtgggggttgagcctctg  
ggtttgggtgtgggggttgagcctc  
ggtttgggtgtgggggttgagcctctgtg  
ggtttgggtgtgggggttgagcctct  
ggtttgggtgtgggggttgagcctct  
ggtttgggtgtgggggttgagcct

**D $\delta$ 2**

7 23 9

ATCGGAGGGATACGAGcagcaggttgcaaacccccatagggacctgtacaaaaact  
 |||  
 AT ATCGGAGGGATACGAGcagcaggttgcaaacccccatagggacctgtacaaaaact  $\Psi$ HJ  
 GGAGGGATACGAGcagcaggttgcaaacccccatagggacctgtacaaaaact  $\Psi$ HJ  
 ACGAGcagcaggttgcaaacccccatagggacctgtacaaaaact  $\Psi$ HJ  
 Gcagcaggttgcaaacccccatagggacctgtacaaaaact  $\Psi$ HJ  
 cacaggttgcaaacccccatagggacctgtacaaaaact SJ/ $\Psi$ HJ  
 cacaggttgcaaacccccatagggacctgtacaaaaact SJ/ $\Psi$ HJ  
 caggttgcaaacccccatagggacctgtacaaaaact SJ/ $\Psi$ HJ  
 caggttgcaaacccccatagggacctgtacaaaaact SJ/ $\Psi$ HJ

CCC  
 AGCCGGT  
 GATGGA  
 AGT  
 ATACAG  
 ACTTGTCAG
