# Supplementary material for: In Vivo Reinsertion of Excised Episomes by the V(D)J Recombinase: A Potential Threat to Genomic Stability
Source: PubMed Central journal article supplement (PMC1820826; doi:10.1371/journal.pbio.0050043), 2007-02-13
Supplement: pbio.0050043.sg006.pdf [file pbio.0050043.sg006.pdf]

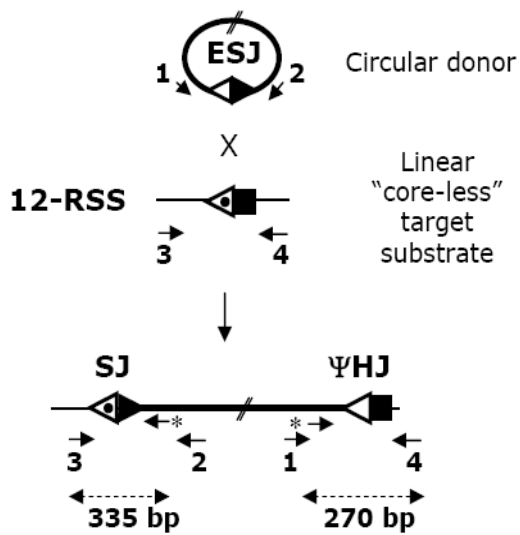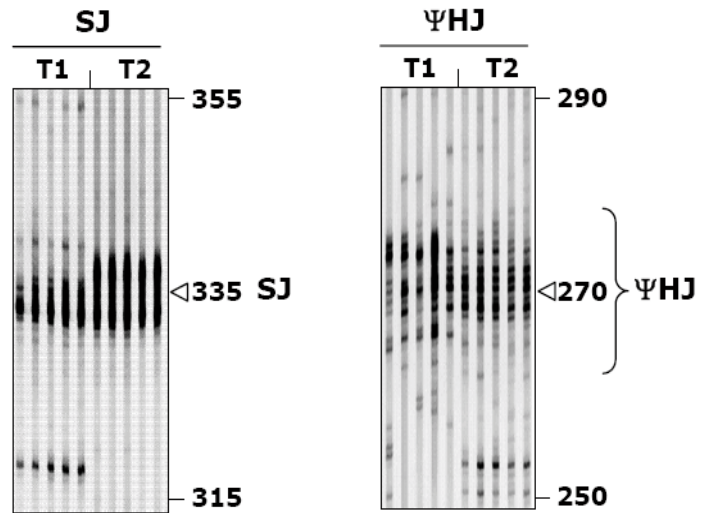

## SJ

### 12-RSS

```

aattattgctgggtaagacaataactgtgTGTGTTACATAGCATTGGAACCTTAGGAAAGCTCITTCCTTGTGTTGT
|||||
aattattgctgggtaagacaataactgtg          cacagtgtacaaaaacctacagagacctgtacaaaaact
aattattgctgggtaagacaataactgtg          cacagtgtacaaaaacctacagagacctgtacaaaaact
aattattgctgggtaagacaataactgtg  AGGG  cacagtgtacaaaaacctacagagacctgtacaaaaact
AGCGCTGAGGTTTTTGGAAACGTCCTCAAGTGTGTTGcacagtgtacaaaaacctacagagacctgtacaaaaact

```

### ESJ

## ΨHJ

### ESJ

```

GGTTTTTGGAAACGTCCTCAAGTGTGTTGcacagtgtacaaaaacctacagagacctgtacaaaaact
|||||
GGTTTTTGGAAACGTCCTCAAGTGTGTTG          G          GCATTGGAACCTTAGGAA
GGTTTTTGGAAACGTCCTCAAGTGTGTTG          TTACATAGCATTGGAACCTTAGGAA
GGTTTTTGGAAACGTCCTCAAGTGTGTTG          TGTGTTACATAGCATTGGAACCTTAGGAA
GGTTTTTGGAAACGTCCTCAAGTGTGTTG          |||||
ccgtgcaccgaaattattgctgggtaagacaataactgtgTGTGTTACATAGCATTGGAACCTTAGGAA

```

### 12-RSS
